# Supplementary material
Source: PubMed Central journal article supplement (PMC4295393)
Supplement: MCB.00764-14_zmb999100682so1.pdf [file MCB.00764-14_zmb999100682so1.pdf]

**A**

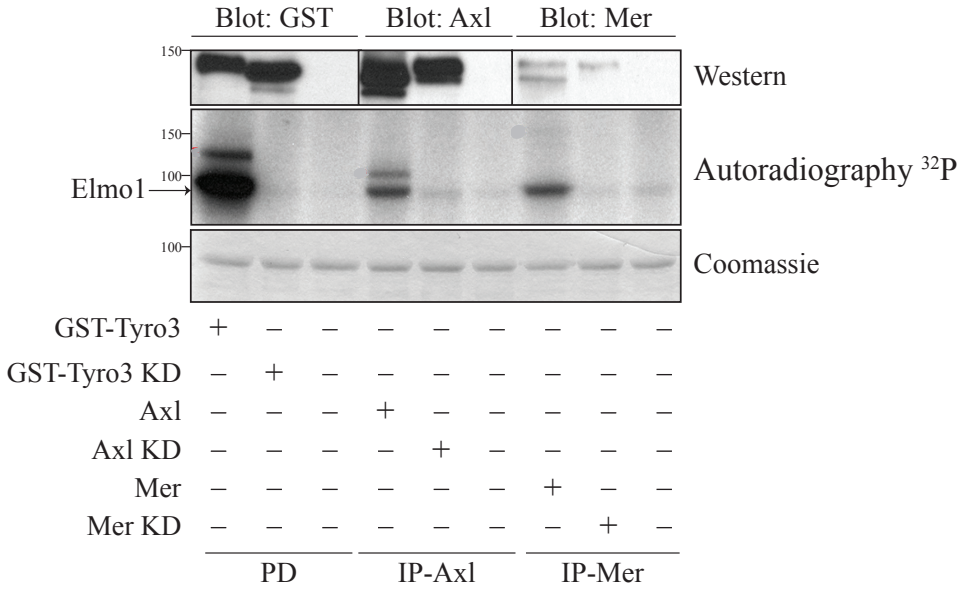

**B**

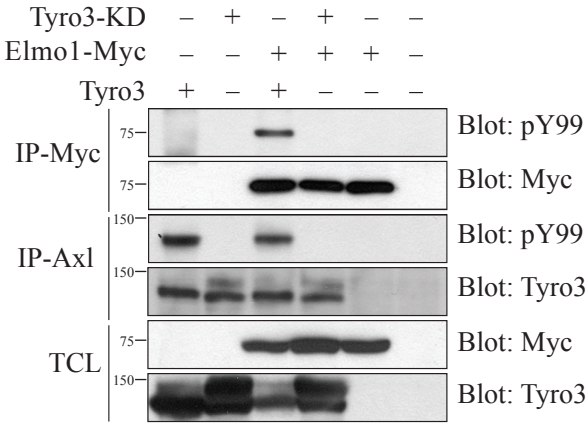

**C**

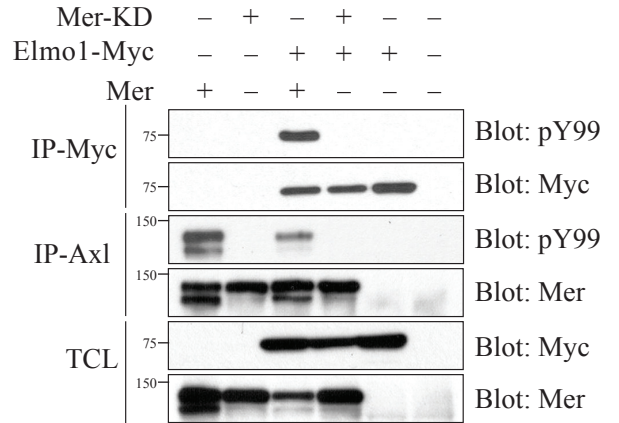

**D**

```

hElmo1 664 IWT DGLNALLGKDMMSDLTRNDLDTLLSMEIKLRLLDLENIQIPDAPPPIPKEPSNYDFVYDCN---- 727
hElmo2 657 IWIDGLSALLGKDMSSSELTKSDLDLTLSEMMLRLLDLENIQIPEAPPPIPKEPSSYDFVYHYG---- 720
hElmo3 706 LWT DGLSALLGSPMGSEQTRL DLEQLLTMETKLRLLLELVNPIPERPPPVPPTNFNFCYDCSIAEP 773
      :*  ***.***.  * *: * : ** : **:* *****:***: ** : ***:*  * :.:* * . .

Elmo 1
Mus Musculus      648 LDTLLSMEIKLRLLDLENIQIPDAP--PPIPKEPSNYDFVY 724
Rattus Norvegicus 648 LDTLLSMEIKLRLLDLENIQIPDAP--PPIPKEPSNYDFVY 724
Homo Sapiens      648 LDTLLSMEIKLRLLDLENIQIPDAP--PPIPKEPSNYDFVY 724
Bos Taurus        648 LDTLLSMEIKLRLLDLENIQIPDAP--PPIPKEPSNYDFVY 724
Gallus Gallus     648 LDTLLSMEIKLRLLDLENIQIPDAP--PPIPKEPSNYDFVY 724
Drosophila Melanogaster 646 FDTLLSMEIKLRLLDTEGVDISKDP--PIPEDPENYDFCF 722
Caenorhabditis Elegans 653 VERMLKMELRVRLNVLNPKLNPEEKPEIPPIDDIKSFISKF 731
      .: .:*.*.*.:***: : : . * ****.: .: :

Elmo 2
Mus Musculus      633 LDTLLSEMMLRLLDLENIQIPEAP--PPVPKEPSSYDFVYHYG 720
Rattus Norvegicus 645 LDTLLSEMMLRLLDLENIQIPEAP--PPVPKEPSSYDFVYHYG 732
Homo Sapiens      633 LDTLLSEMMLRLLDLENIQIPEAP--PPIPKEPSSYDFVYHYG 720
Bos Taurus        633 RDTLLSEMMLRLLDLENIQIPEAP--PPVPKEPSSYDFVYHYG 720
Gallus Gallus     633 LDTLLSEMMLRLLDLENIQIPEAP--PPIPKEPSSYDFVYHYG 720
Drosophila Melanogaster 638 FDTLLSMEIKLRLLDTEGVDISKDP--PIPEDPENYDFCFES- 724
Caenorhabditis Elegans 645 VERMLKMELRVRLNVLNPKLNPEEKPEIPPIDDIKSFISKF--- 731
      : :*.***.:***: : : : * **:*.: .: :
  
```

**Figure S1. Elmo phosphorylation by the TAM receptors.** (A) Lysates of transfected HEK293T cells with indicated plasmids were either immunoprecipitated with antibodies anti-Axl or anti-Mer or glutathione-precipitated with GST-Tyro3 and were incubated with 5 $\mu$ g of GST-Elmo1 and  $\gamma$ 32-ATP. The expression of the proteins were analyzed by Coomassie staining and the phosphorylation by autoradiography (n=3). (B-C) Lysates of HEK293T cells transfected with the indicated plasmids were immunoprecipitated with an antibody against the Myc-epitope (Elmo1) and with an antibody against Tyro3 (B) or Mer (C). The phosphorylation and expression levels of Elmo1, Tyro3 and Mer were analyzed via immunoblotting with anti-Myc (Elmo1) and anti-Tyro3 (B) or anti-Mer (C) antibodies, respectively. (D) Elmo protein sequence alignment in different species near identified phosphorylation sites Y720 (highlighted in green) and Y724 (highlighted in yellow).

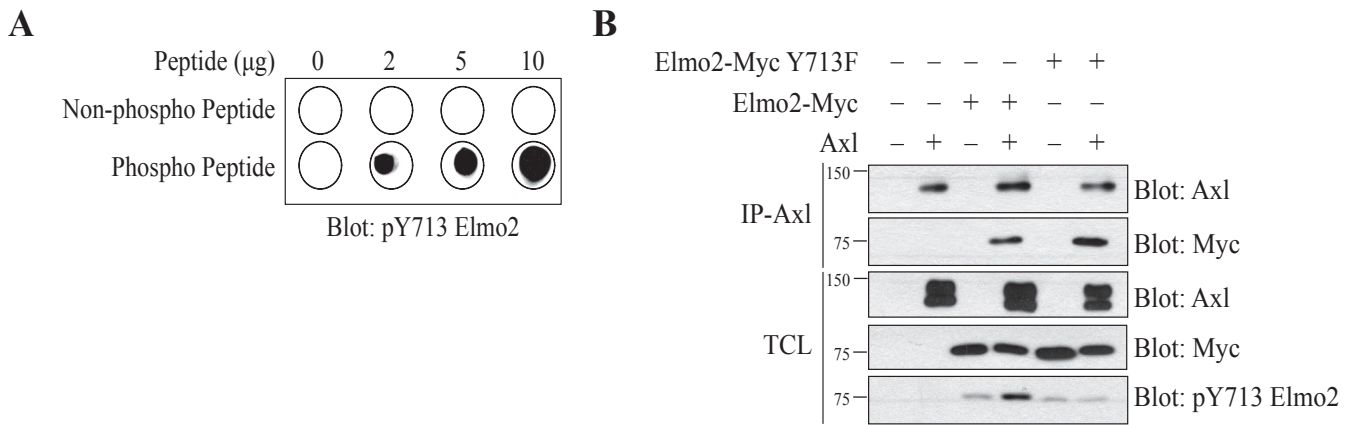

**Figure S2. Specificity of pY713 Elmo2 antibody.** (A) The purified tyrosine 713 phosphospecific antibody was used for dot blot analysis of increasing amounts (0-10 $\mu\text{g}$ ) of the phosphorylated and the non-phosphorylated immunogenic peptides used for affinity purification of the serum. (B) Elmo2 phospho-mutant Y720F is able to bind Axl and diminish phosphorylation detected by Elmo2 phospho-specific antibody anti-pY713. Lysates of HEK293T cells transfected with the indicated plasmids were co-immunoprecipitated with an antibody against Axl. The co-precipitation and expression levels of the Axl proteins and Elmo2 were analyzed via immunoblotting with anti-Myc (Elmo2) and anti-Axl antibodies, respectively. Phosphorylation of Elmo2 is detected by immunoblotting using anti-pY713 Elmo2 antibody.



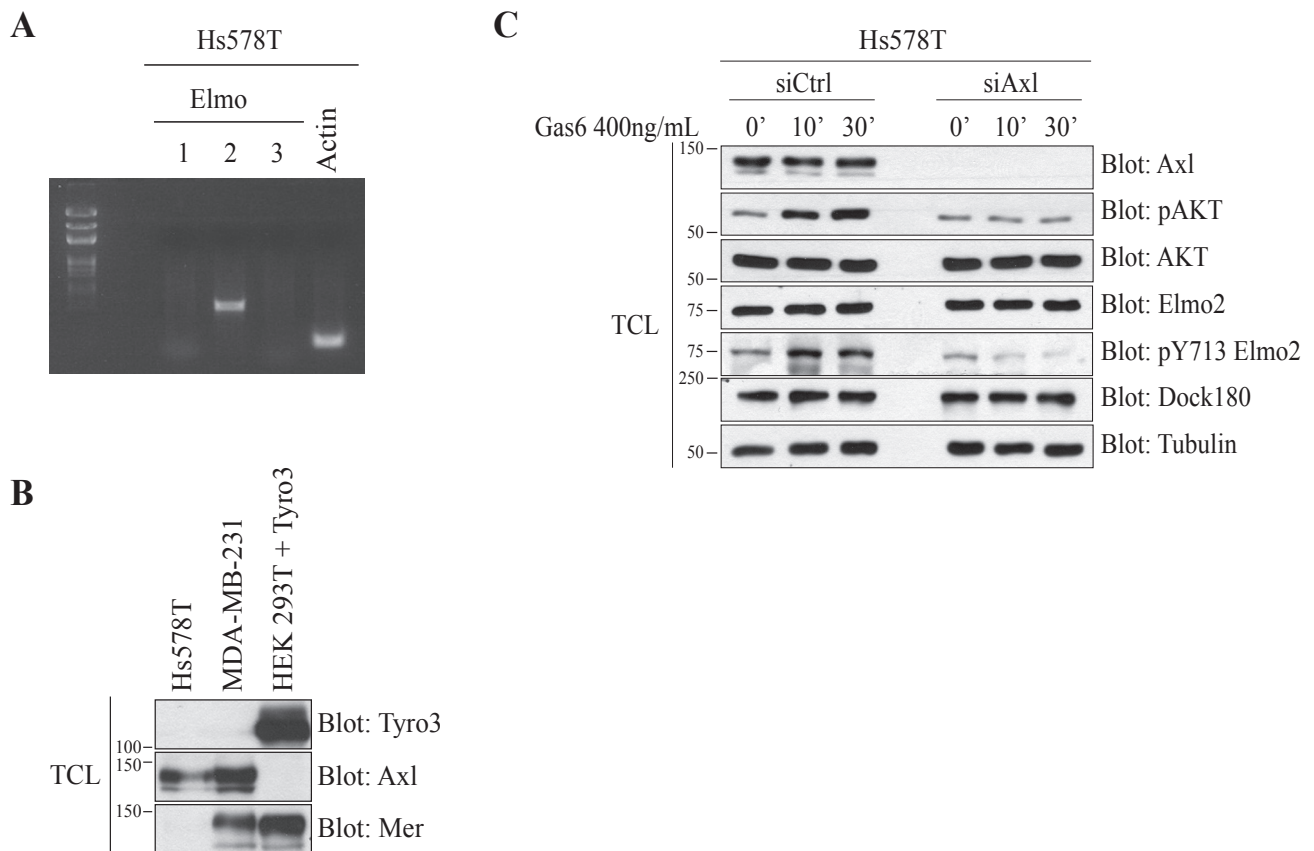

**Figure S4. Expression Profile of the TAM receptors and Elmo proteins in MDA-MB-231 and Hs578T cells.** (A) RT-PCR analysis on RNA extracted from Hs578T cells using specific primers for Actin, Elmo1, Elmo2 and Elmo3 (Table 3) (B) Lysates of MDA-MB-231 cells, Hs578T cells and transfected HEK293T cells were analyzed for Axl, Tyro3 and Mer expression via immunoblotting using anti-Axl, anti-Tyro3 and anti-Mer. (C) Phosphorylation of Elmo2 in Hs578T cells is dependent on Axl expression. Hs578T cells were transfected with 100nM NON-targeting or ON-target smart pool Axl siRNA prior to being treated with 400ng/mL of Gas6 for the indicated time points. Cell lysates were analyzed via immunoblotting with anti-pAKT, anti-AKT, anti-Axl, anti-Elmo2, anti-pY713 Elmo2, anti-Dock180 and anti-Tubulin antibodies.

**A**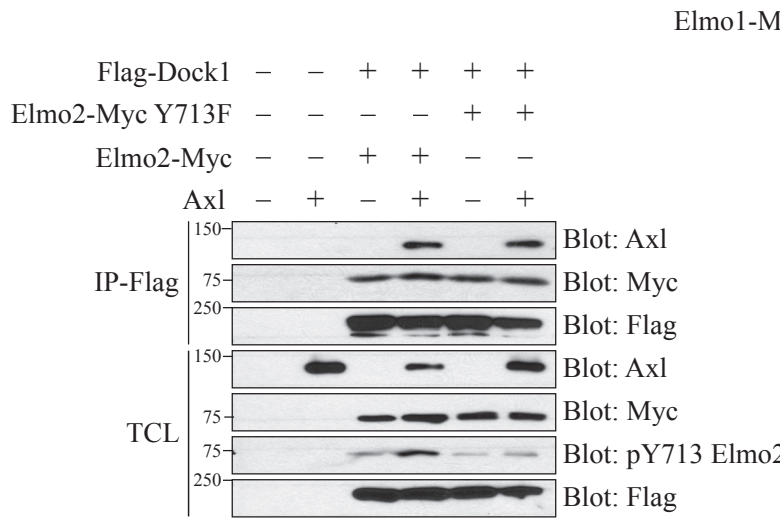**C**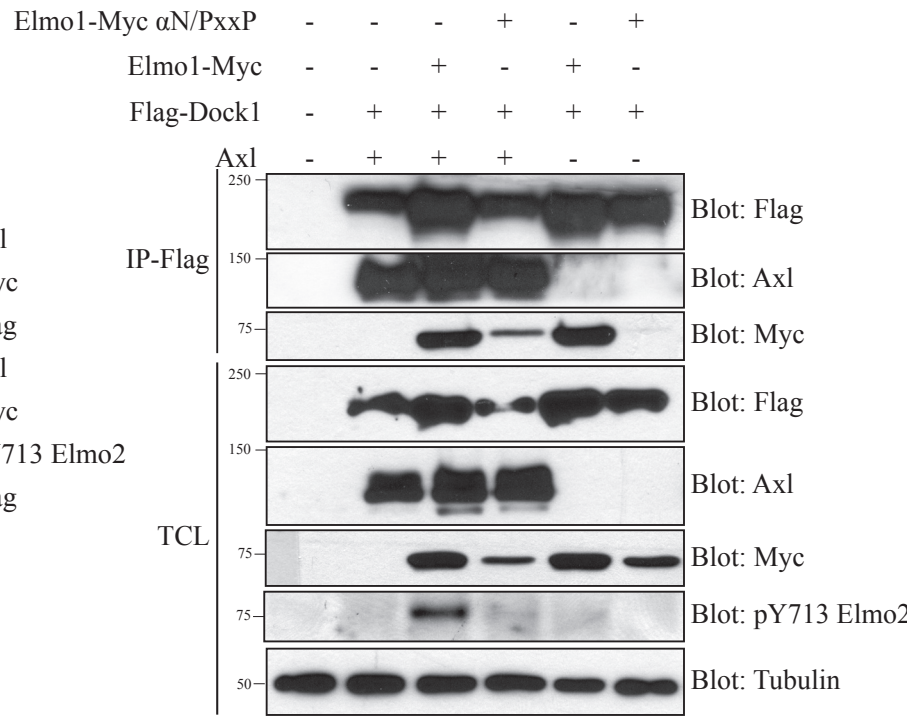**B**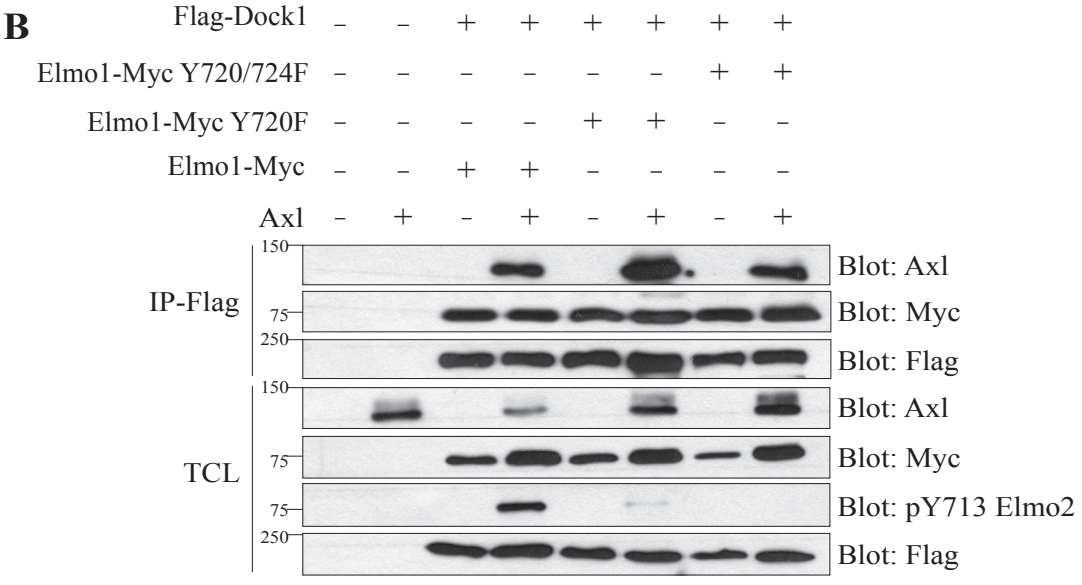

**Figure S5. Axl forms a complex with Elmo/Dock1.** (A-B) Lysates of HEK293T cells transfected with the indicated plasmids were co-immunoprecipitated with an antibody against Flag-Dock180. The co-precipitation and expression levels of the Axl, Elmo1 (B), Elmo2 (A) and Dock180 were analyzed via immunoblotting with anti-Myc (Elmo), anti-Axl and anti-Flag antibodies. Phosphorylated Elmo in the lysates is detected with the antibody anti-pY713. (C) Lysates of HEK293T cells transfected with the indicated plasmids were co-immunoprecipitated with an antibody against Flag-Dock1. The co-precipitation and expression levels of the Axl, Elmo1, Tubulin and Dock1 were analyzed via immunoblotting with anti-Myc (Elmo), anti-Axl, anti-Tubulin and anti-Flag antibodies. Phosphorylated Elmo in the lysates is detected with the antibody anti-pY713 Elmo2.

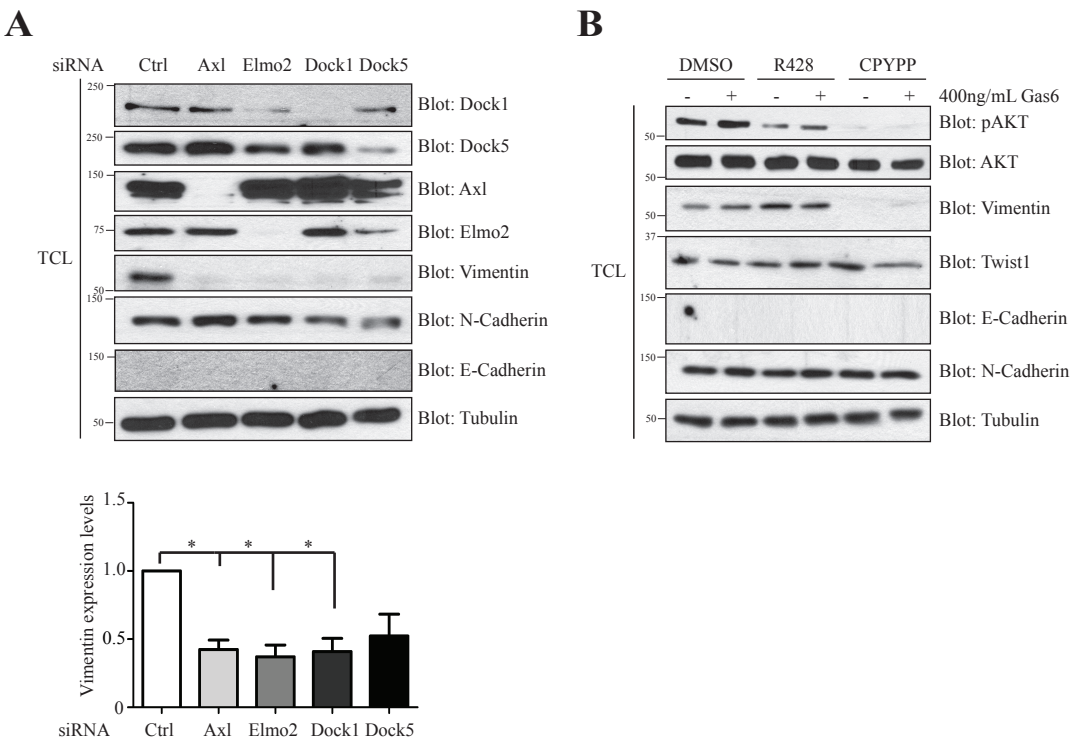

**Figure S6. Inhibition of activation or knockdown of Axl, Elmo2, Dock1 and Dock5 alter Vimentin Expression.** (A) MDA-MB-231 cells were transfected with either 100nM NON-targeting siRNA, 100nM ON-target Axl siRNA, 60nM ON-target Elmo2 siRNA or 200nM ON-target Dock1 or Dock5 siRNA. The expression levels of Axl, Elmo2, Dock1, Dock5, N-Cadherin, E-Cadherin, Vimentin and Tubulin were analyzed via immunoblotting with anti-Axl, anti-Elmo2, anti-Dock1, anti-Dock5, anti-N-Cadherin, anti-E-Cadherin, anti-Vimentin and anti-Tubulin antibodies. The expression levels of Vimentin were quantified by the software Image J (n=3). Data are shown as mean  $\pm$  SEM; \* $p < 0.05$ ; one-way ANOVA. (B) Serum-starved MDA-MB-231 cells were treated with 100 $\mu$ M CPYPP or with 1 $\mu$ M R428 for 1hr followed by 400ng/mL Gas6 for 20min. Lysates were then analyzed for expression of Twist1, N-Cadherin, E-Cadherin, Vimentin, p-AKT, AKT and Tubulin via immunoblotting with anti-Twist1, anti-N-Cadherin, anti-E-Cadherin, anti-Vimentin, anti-pAKT, anti-AKT and anti-Tubulin antibodies.



**Table S1** : GST-kinase library (List of human protein kinases in the GST-kinase expression library used in Fig. 1 to screen.

| <b>Gene Name</b> | <b>Gene Description</b>                                                             |
|------------------|-------------------------------------------------------------------------------------|
| ABL2             | v-abl Abelson murine leukemia viral oncogene homolog 2 (arg, Abelson-related gene)  |
| ACVR1            | activin A receptor, type I                                                          |
| ACVR1B           | activin A receptor, type IB                                                         |
| ADCK4            | aarF domain containing kinase 4                                                     |
| ADRBK1           | adrenergic, beta, receptor kinase 1                                                 |
| AKT1             | v-akt murine thymoma viral oncogene homolog 1                                       |
| ALS2CR2          | amyotrophic lateral sclerosis 2 (juvenile) chromosome region, candidate 2 (ALS2CR2) |
| ARAF             | v-raf murine sarcoma 3611 viral oncogene homolog                                    |
| AURKB            | aurora kinase B (AURKB), mRNA                                                       |
| BLK              | B lymphoid tyrosine kinase (BLK), mRNA                                              |
| BMP2K            | BMP2 inducible kinase                                                               |
| BMX              | BMX non-receptor tyrosine kinase                                                    |
| BRAF             | v-raf murine sarcoma viral oncogene homolog B1                                      |
| BRD2             | bromodomain containing 2                                                            |
| BUB1             | BUB1 budding uninhibited by benzimidazoles 1 homolog (yeast)                        |
| BUB1B            | BUB1 budding uninhibited by benzimidazoles 1 homolog beta (yeast)                   |
| C9orf96          | chromosome 9 open reading frame 96                                                  |
| CAMK1G           | calcium/calmodulin-dependent protein kinase IG                                      |
| CAMK2G           | calcium/calmodulin-dependent protein kinase (CaM kinase) II gamma                   |
| CAMK4            | calcium/calmodulin-dependent protein kinase IV                                      |
| CAMKK2           | calcium/calmodulin-dependent protein kinase kinase 2                                |
| CAMKV            | CaM kinase-like vesicle-associated                                                  |
| CDC2             | cell division cycle 2, G1 to S and G2 to M                                          |
| CDC2L6           | cell division cycle 2-like 6 (CDK8-like)                                            |
| CDK10            | cyclin-dependent kinase (CDC2-like) 10                                              |
| CDK2             | cyclin-dependent kinase 2                                                           |
| CDK3             | cyclin-dependent kinase 3                                                           |
| CDK4             | cyclin-dependent kinase 4                                                           |
| CDK6             | cyclin-dependent kinase 6                                                           |



|          |                                                                                         |
|----------|-----------------------------------------------------------------------------------------|
| CDK7     | cyclin-dependent kinase 7 (MO15 homolog, <i>Xenopus laevis</i> , cdk-activating kinase) |
| CDKL5    | cyclin-dependent kinase-like 5                                                          |
| CHEK2    | CHK2 checkpoint homolog ( <i>S. pombe</i> )                                             |
| CLK1     | CDC-like kinase 1                                                                       |
| CLK3     | CDC-like kinase 3                                                                       |
| CLK4     | CDC-like kinase 4                                                                       |
| CSNK1A1L | casein kinase 1, alpha 1-like                                                           |
| CSNK1D   | casein kinase 1, delta                                                                  |
| CSNK1E   | casein kinase 1, epsilon                                                                |
| CSNK1G2  | casein kinase 1, gamma 2                                                                |
| CSNK2A1  | casein kinase 2, alpha 1 polypeptid                                                     |
| DCAMKL2  | doublecortin and CaM kinase-like 2                                                      |
| DLCK1    | doublecortin and CaM kinase-like 1 (DCAMKL1)                                            |
| DMPK     | dystrophia myotonica-protein kinase                                                     |
| DYRK1B   | dual-specificity tyrosine-(Y)-phosphorylation regulated kinase 1B                       |
| DYRK2    | dual-specificity tyrosine-(Y)-phosphorylation regulated kinase 2                        |
| DYRK4    | dual-specificity tyrosine-(Y)-phosphorylation regulated kinase 4                        |
| EEF2K    | eukaryotic elongation factor-2 kinase                                                   |
| EIF2AK1  | eukaryotic translation initiation factor 2-alpha kinase 1                               |
| EIF2AK2  | eukaryotic translation initiation factor 2-alpha kinase 2                               |
| FASTK    | Fas-activated serine/threonine kinase                                                   |
| FASTKD2  | FAST kinase domains 2                                                                   |
| FES      | feline sarcoma oncogene                                                                 |
| FGFR1    | fibroblast growth factor receptor 1 (fms-related tyrosine kinase 2, Pfeiffer syndrome)  |
| FRK      | fyn-related kinase                                                                      |
| FYN      | FYN oncogene related to SRC, FGR, YES                                                   |
| GRK5     | G protein-coupled receptor kinase 5                                                     |
| GRK6     | G protein-coupled receptor kinase 6                                                     |
| GSK3A    | glycogen synthase kinase 3 alpha                                                        |
| HCK      | hemopoietic cell kinase                                                                 |
| HIPK1    | homeodomain interacting protein kinase 1                                                |
| HIPK4    | homeodomain interacting protein kinase 4                                                |

|         |                                                         |
|---------|---------------------------------------------------------|
| ICK     | intestinal cell (MAK-like) kinase                       |
| ILK     | integrin-linked kinase                                  |
| IRAK3   | interleukin-1 receptor-associated kinase 3              |
| IRAK4   | interleukin-1 receptor-associated kinase 4              |
| JAK2    | Janus kinase                                            |
| KSR2    | kinase suppressor of ras                                |
| LATS1   | LATS, large tumor suppressor, homolog 1 (Drosophila)    |
| LYK5    | protein kinase LYK5                                     |
| MAP2K1  | mitogen-activated protein kinase kinase 1               |
| MAP2K2  | mitogen-activated protein kinase kinase 2               |
| MAP2K3  | mitogen-activated protein kinase kinase 3               |
| MAP2K4  | mitogen-activated protein kinase kinase 4               |
| MAP2K6  | mitogen-activated protein kinase kinase 6               |
| MAP3K11 | mitogen-activated protein kinase kinase kinase 11       |
| MAP3K14 | mitogen-activated protein kinase kinase kinase 14       |
| MAP3K8  | mitogen-activated protein kinase kinase kinase 8        |
| MAP4K2  | mitogen-activated protein kinase kinase kinase kinase 2 |
| MAP4K5  | mitogen-activated protein kinase kinase kinase kinase 5 |
| MAPK10  | mitogen-activated protein kinase 10                     |
| MAPK11  | mitogen-activated protein kinase 11                     |
| MAPK12  | mitogen-activated protein kinase 12                     |
| MAPK13  | mitogen-activated protein kinase 13                     |
| MAPK3   | mitogen-activated protein kinase 3                      |
| MAPK8   | mitogen-activated protein kinase 8                      |
| MAPK9   | mitogen-activated protein kinase 9                      |
| MARK2   | MAP/microtubule affinity-regulating kinase 2            |
| MARK3   | MAP/microtubule affinity-regulating kinase 3            |
| MAST2   | microtubule associated serine/threonine kinase 2        |
| MKNK1   | MAP kinase interacting serine/threonine kinase 1        |
| MYLK2   | myosin light chain kinase 2, skeletal muscle            |
| NEK2    | NIMA (never in mitosis gene a)-related kinase 2         |
| NEK3    | NIMA (never in mitosis gene a)-related kinase 3         |

|        |                                                              |
|--------|--------------------------------------------------------------|
| NEK4   | NIMA (never in mitosis gene a)-related kinase 4              |
| NEK6   | NIMA (never in mitosis gene a)-related kinase 6              |
| NEK8   | NIMA (never in mitosis gene a)-related kinase 8              |
| NLK    | nemo-like kinase                                             |
| NRBP1  | nuclear receptor binding protein 1                           |
| NUAK1  | NUAK family, SNF1-like kinase, 1 (ARK5)                      |
| NUAK2  | NUAK family, SNF1-like kinase, 2 (SNARK)                     |
| OXSRI  | oxidative-stress responsive 1                                |
| PAK1   | p21/Cdc42/Rac1-activated kinase 1 (STE20 homolog, yeast)     |
| PAK2   | p21 (CDKN1A)-activated kinase 2                              |
| PAK4   | p21 (CDKN1A)-activated kinase 4                              |
| PAK6   | p21 (CDKN1A)-activated kinase 6                              |
| PAK7   | p21 (CDKN1A)-activated kinase 7                              |
| PBK    | PDZ binding kinase                                           |
| PCK1   | PCTAIRE protein kinase 1                                     |
| PCK2   | PCTAIRE protein kinase 2                                     |
| PCK3   | PCTAIRE protein kinase 3                                     |
| PDIK1L | PDLIM1 interacting kinase 1 like                             |
| PFTK1  | PFTAIRE protein kinase 1                                     |
| PIM1   | pim-1 oncogene                                               |
| PIM3   | pim-3 oncogene                                               |
| PKMYT1 | protein kinase, membrane associated tyrosine/threonine 1     |
| PKN3   | protein kinase N3                                            |
| PLK1   | polo-like kinase 1 (Drosophila)                              |
| PLK2   | polo-like kinase 2 (Drosophila)                              |
| PLK4   | polo-like kinase 4 (Drosophila)                              |
| PNCK   | pregnancy upregulated non-ubiquitously expressed CaM kinase  |
| PRKACG | protein kinase, cAMP-dependent, catalytic, gamma             |
| PRKAG1 | protein kinase, AMP-activated, gamma 1 non-catalytic subunit |
| PRKC1B | protein kinase C, beta 1                                     |
| PRKCA  | protein kinase C, alpha                                      |
| PRKCH  | protein kinase C, eta                                        |

|         |                                                                              |
|---------|------------------------------------------------------------------------------|
| PRKCI   | protein kinase C, iota                                                       |
| PRKCZ   | protein kinase C, zeta                                                       |
| PRKD2   | protein kinase D2                                                            |
| PRKRA   | protein kinase, interferon-inducible double stranded RNA dependent activator |
| PRKX    | protein kinase, X-linked                                                     |
| PRPF4B  | PRP4 pre-mRNA processing factor 4 homolog B (yeast)                          |
| PSKH1   | protein serine kinase H1                                                     |
| RAF1    | v-raf-1 murine leukemia viral oncogene homolog 1                             |
| RAGE    | renal tumor antigen                                                          |
| RIOK1   | RIO kinase 1 (yeast)                                                         |
| RIOK2   | RIO kinase 2 (yeast)                                                         |
| RIPK2   | receptor-interacting serine-threonine kinase 2                               |
| RIPK3   | receptor-interacting serine-threonine kinase 3                               |
| RPS6KA1 | ribosomal protein S6 kinase, 90kDa, polypeptide 1                            |
| RPS6KL1 | ribosomal protein S6 kinase-like 1                                           |
| SCYL3   | SCY1-like 3                                                                  |
| SGK2    | serum/glucocorticoid regulated kinase 2                                      |
| SGK3    | serum/glucocorticoid regulated kinase 3                                      |
| SNF1LK  | SNF1-like kinase                                                             |
| SRC     | v-src sarcoma (Schmidt-Ruppin A-2) viral oncogene homolog (avian)            |
| SRPK1   | SFRS protein kinase 1                                                        |
| SRPK2   | SFRS protein kinase 2                                                        |
| STK11   | serine/threonine kinase 11                                                   |
| STK16   | serine/threonine kinase 16                                                   |
| STK17A  | serine/threonine kinase 17a                                                  |
| STK17b  | serine/threonine kinase 17b                                                  |
| STK19   | serine/threonine kinase 19                                                   |
| STK25   | serine/threonine kinase 25                                                   |
| STK31   | serine/threonine kinase 31                                                   |
| STK32A  | serine/threonine kinase 32A                                                  |
| STK32B  | serine/threonine kinase 32B                                                  |
| STK33   | serine/threonine kinase 33                                                   |

|        |                                                                                  |
|--------|----------------------------------------------------------------------------------|
| STK36  | serine/threonine kinase 36 (fused homolog, Drosophila)                           |
| STK38  | serine/threonine kinase 38                                                       |
| STK38L | serine/threonine kinase 38 like                                                  |
| STK40  | serine/threonine kinase 40                                                       |
| SYK    | spleen tyrosine kinase                                                           |
| TAF1   | TAF1 RNA polymerase II, TATA box binding protein (TBP)-associated factor, 250kDa |
| TBK1   | TANK-binding kinase 1                                                            |
| TESK1  | testis-specific kinase 1                                                         |
| TLK1   | tousled-like kinase 1                                                            |
| TNK2   | Similar to activated p21cdc42Hs kinase                                           |
| TP53RK | TP53 regulating kinase                                                           |
| TSSK1B | testis-specific serine kinase 1B                                                 |
| TSSK2  | testis-specific serine kinase 2                                                  |
| TSSK6  | testis-specific serine kinase 6                                                  |
| TTBK2  | tau tubulin kinase 2                                                             |
| TTK    | TTK protein kinase                                                               |
| TYK2   | tyrosine kinase 2                                                                |
| TYRO3  | TYRO3 protein tyrosine kinase                                                    |
| UHMK1  | U2AF homology motif (UHM) kinase 1                                               |
| ULK4   | unc-51-like kinase 4 (C. elegans)                                                |
| VRK1   | vaccinia related kinase 1                                                        |
| WEE1   | WEE1 homolog (S. pombe)                                                          |
| YES1   | v-yes-1 Yamaguchi sarcoma viral oncogene homolog 1                               |
| YSK4   | yeast Sps1/Ste20-related kinase 4 (S. cerevisiae)                                |

**Table S2** : List of kinases capable of phosphorylating Elmo1 identified in the screen for kinases.

| <b>Identified Kinase</b>                      | <b>Synonym</b>                                                                    | <b>Kinase type</b>          | <b>Validation IRCM</b> |
|-----------------------------------------------|-----------------------------------------------------------------------------------|-----------------------------|------------------------|
| <b>BLK</b><br>(B-Lymphocyte Kinase)           | p55-BLK                                                                           | Non-receptor Tyr Kinase     | Not tested             |
| <b>CAMKK2</b><br>(CaM-kinase kinase 2)        | Calcium/calmodulin-dependent protein kinase, CaMKK beta and KKCC2                 | Non-receptor Ser/Thr Kinase | Not tested             |
| <b>DCAMKL1</b>                                | DCDC3A, DCLK1, DCAK1, CAM kinase-like 1 and KIAA0369                              | Non-receptor Ser/Thr Kinase | Negative               |
| <b>PFTAIRE1</b><br>(PFTAIRE protein kinase 1) | KIAA0834, PFT1 and PFTK1                                                          | Non-receptor Ser/Thr Kinase | Negative               |
| <b>PRP4</b><br>(pre-mRNA processing factor 4) | CBP143, KIAA0536, Pre-mRNA protein kinase, PRP4B, PRP4H, PRP4K, PRP4M, and PRPF4B | Non-receptor Ser/Thr Kinase | Not tested             |
| <b>TTBK2</b><br>(Tau-tubulin kinase 2)        |                                                                                   | Non-receptor Ser/Thr Kinase | Non tested             |
| <b>Tyro3</b><br>(Tyrosine kinase gene 3)      | Sky, Brt (mouse), Rse, Etk-2 (mouse), Rek (chicken), DTK(mouse) and Tif           | Receptor Tyrosine Kinase    | Positive               |

**Table S3:** Primers used for different procedures

| <b>Procedure</b>                             | <b>Forward</b>                                  | <b>Reverse</b>                                   |
|----------------------------------------------|-------------------------------------------------|--------------------------------------------------|
| RT-PCR Human <i><math>\beta</math>-Actin</i> | TGATGGTGGGCATGGGTCAGAA                          | TCCATGTCGTCCCAGTTGGTGA                           |
| RT-PCR Human <i>Elmo1</i>                    | CACGATCACAGTGCAGA                               | CAACTTTCAGCCCCTAGCTG                             |
| RT-PCR Human <i>Elmo2</i>                    | CGTTGCCAAACCCAGAGTAT                            | TGGAGGTGTGAGATGAGCTG                             |
| RT-PCR Human <i>Elmo3</i>                    | TGACGCACTCTGAGCGTTAC                            | CAAGGTCACACTCTCCAGCA                             |
| To generate Axl-KD (K561M)                   | CTCAAGGTCGCTGTGATGACCATGA<br>AAATTGCC           | GGCAATTTTCATGGTCATCACAGCG<br>ACCTTGAG            |
| To generate Elmo1 Y352F                      | GAGAAACGCAAGTCCATGTTCACTC<br>GGGATTATAAAAAAC    | GTTTTTTATAATCCCGAGTGAACATG<br>GACTTGCGTTTCTC     |
| To generate Elmo1 Y720F                      | CCCAAGGAACCTAGCAACTTTGACT<br>TTGTCTATGACTGTAAGT | CAGTTACAGTCATAGACAAAGTCAA<br>AGTTGCTAGGTTCCCTGGG |
| To generate Elmo1 Y724F                      | CCCAAGGAACCTAGCAACTATGACT<br>TTGTCTTTGACTGTAAGT | CAGTTACAGTCAAAGACAAAGTCAT<br>AGTTGCTAGGTTCCCTGGG |
| To generate Elmo1 Y720/724F                  | CCCAAGGAACCTAGCAACTTTGACT<br>TTGTCTTTGACTGTAAGT | CAGTTACAGTCAAAGACAAAGTCAA<br>AGTTGCTAGGTTCCCTGGG |
